# Supplementary material for: mmi1 and rep2 mRNAs are novel RNA targets of the Mei2 RNA-binding protein during early meiosis in Schizosaccharomyces pombe
Source: PubMed Central journal article supplement (PMC6170507; doi:10.1098/rsob.180110), 2018-09-26

## Supplementary Figure S1

### A Time after nitrogen starvation

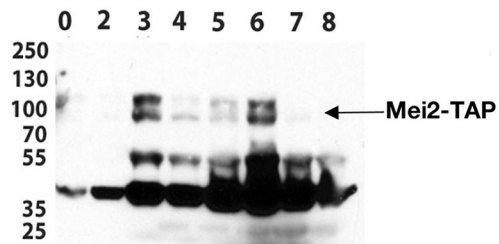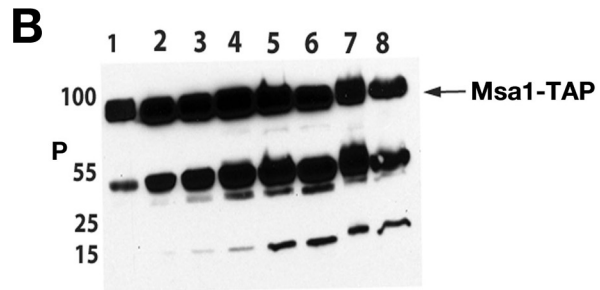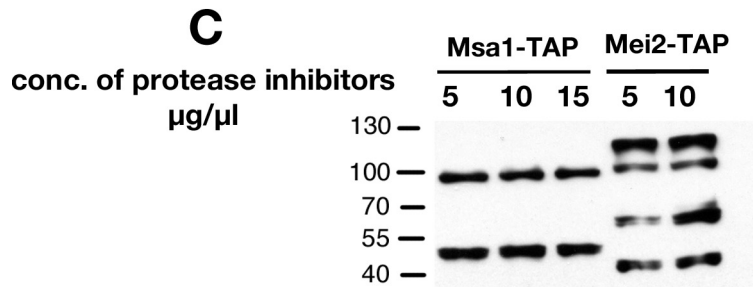

# Supplementary Figure S2

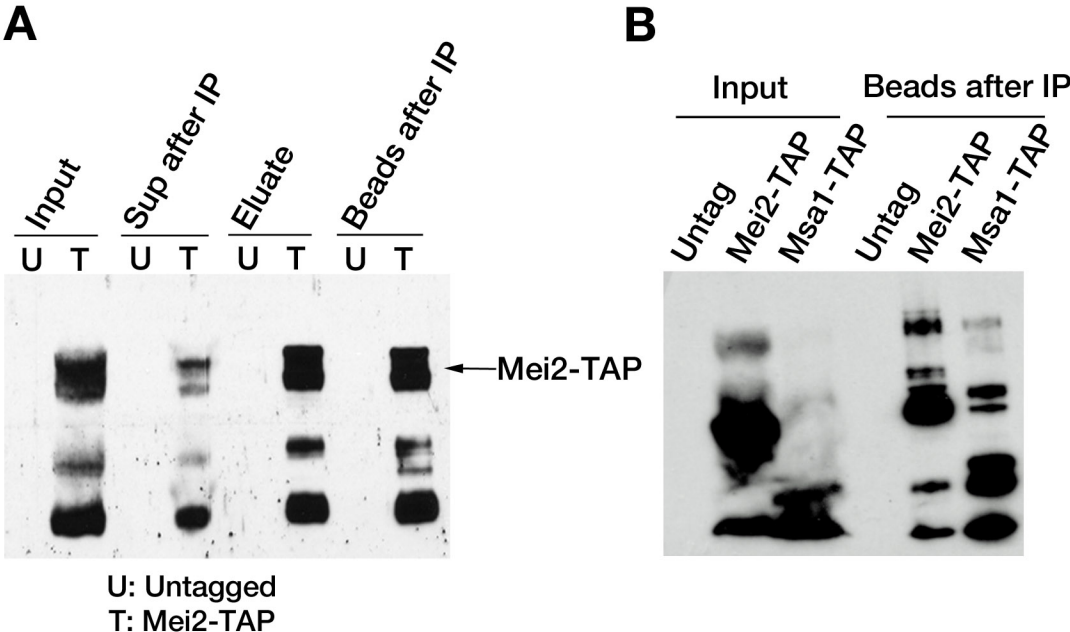

# Supplementary Figure S3

## A

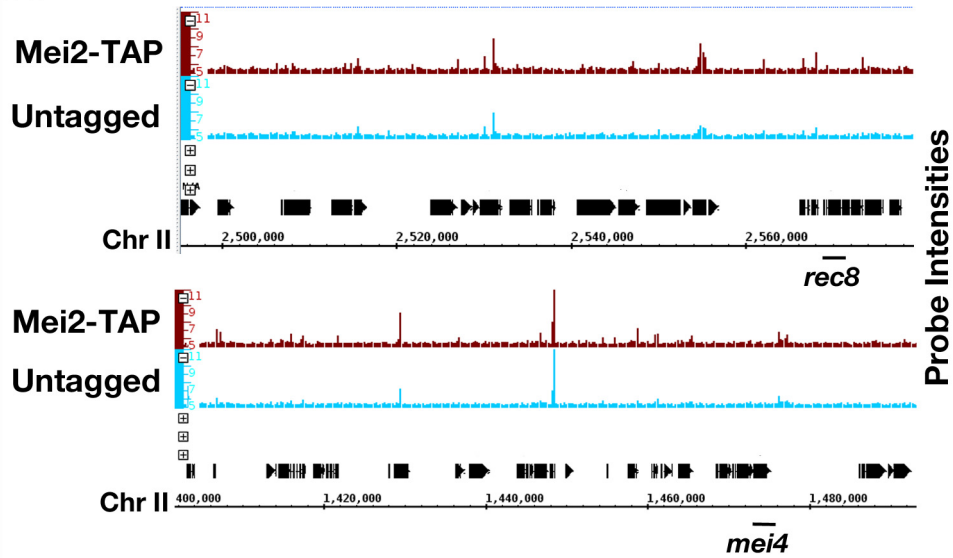

## B

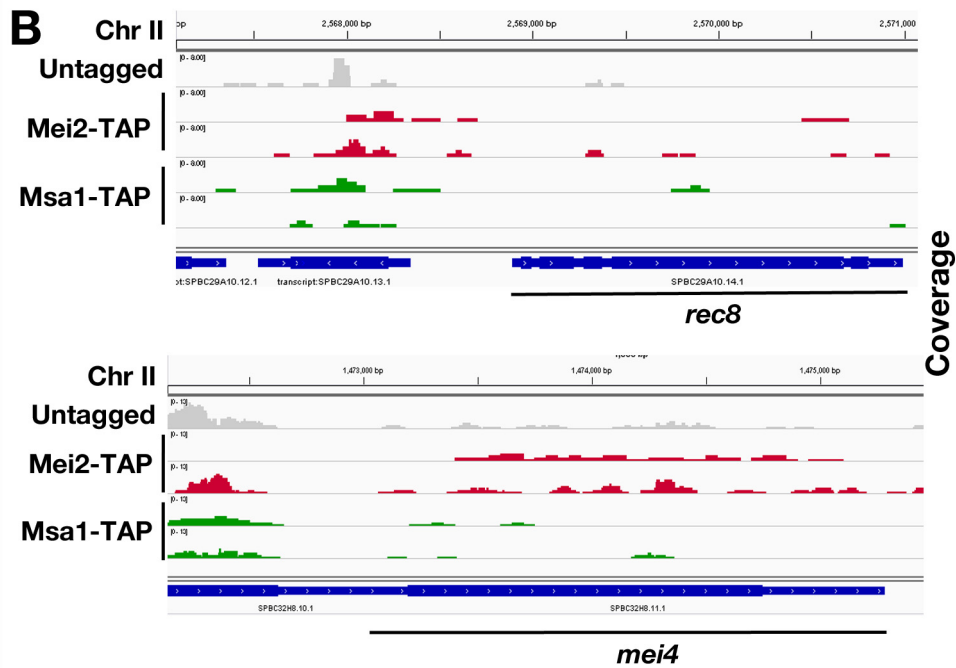

# Supplementary Figure S4

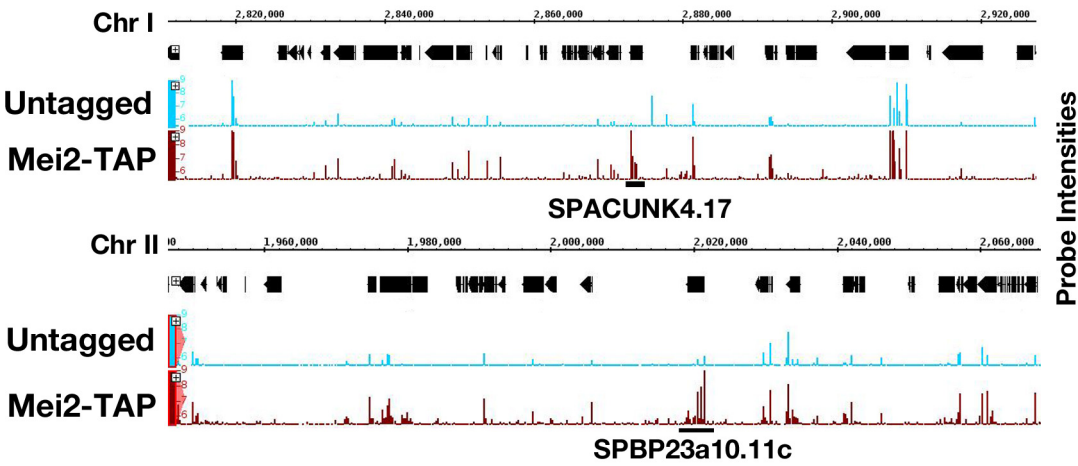

# Supplementary Figure S5

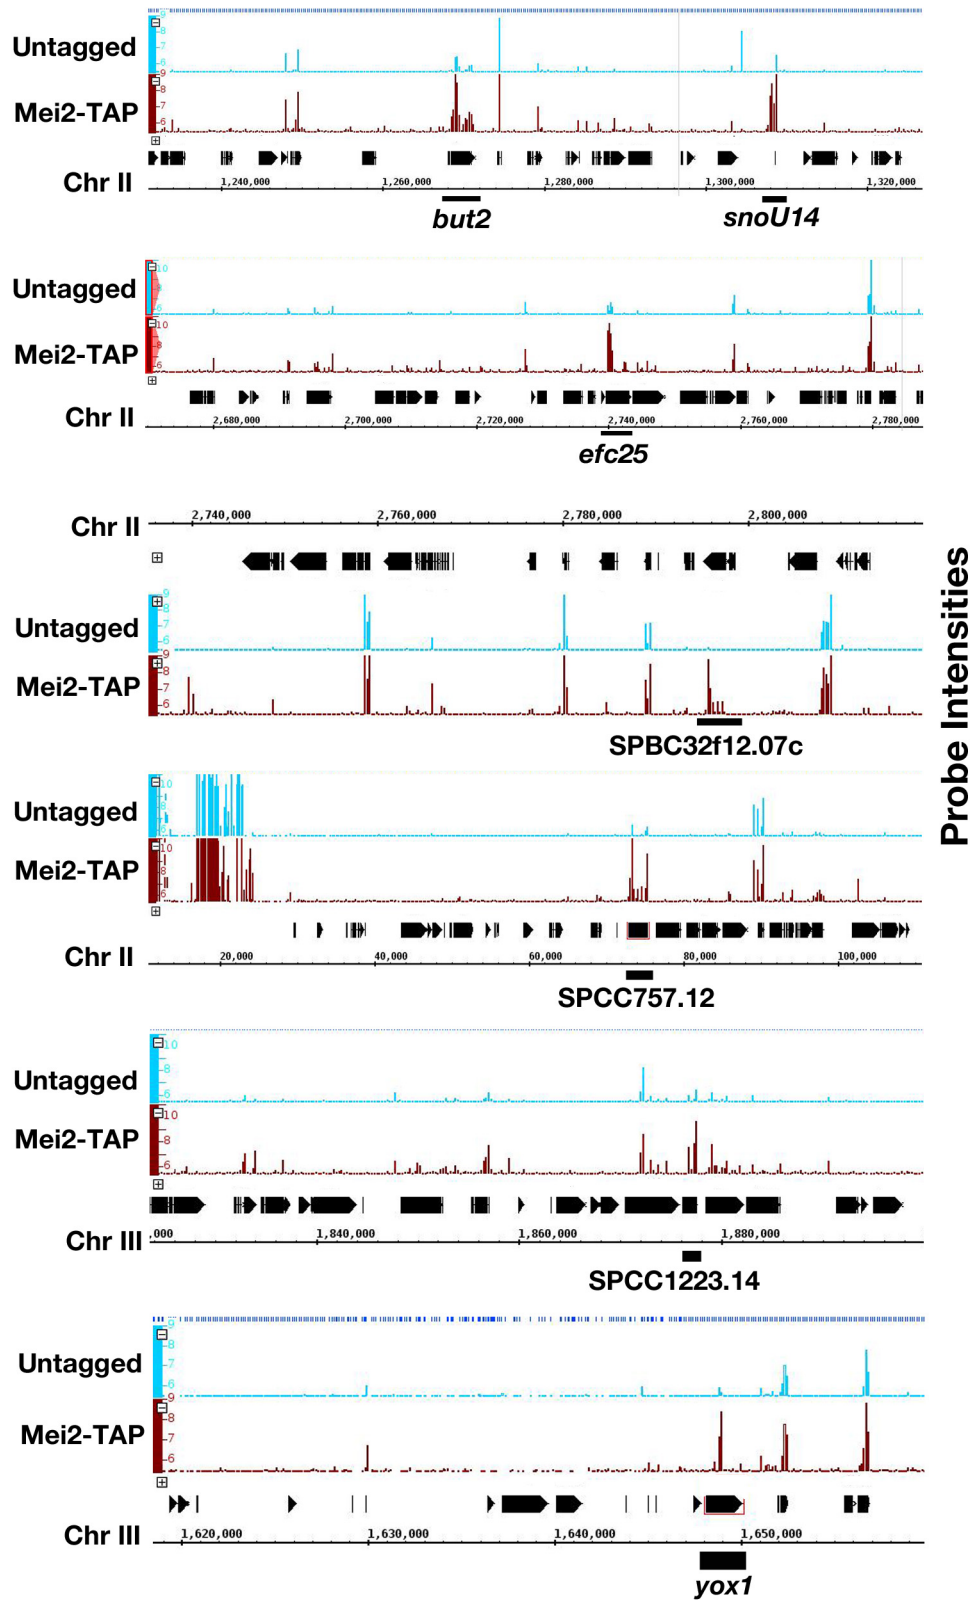



# Supplementary Figure S7

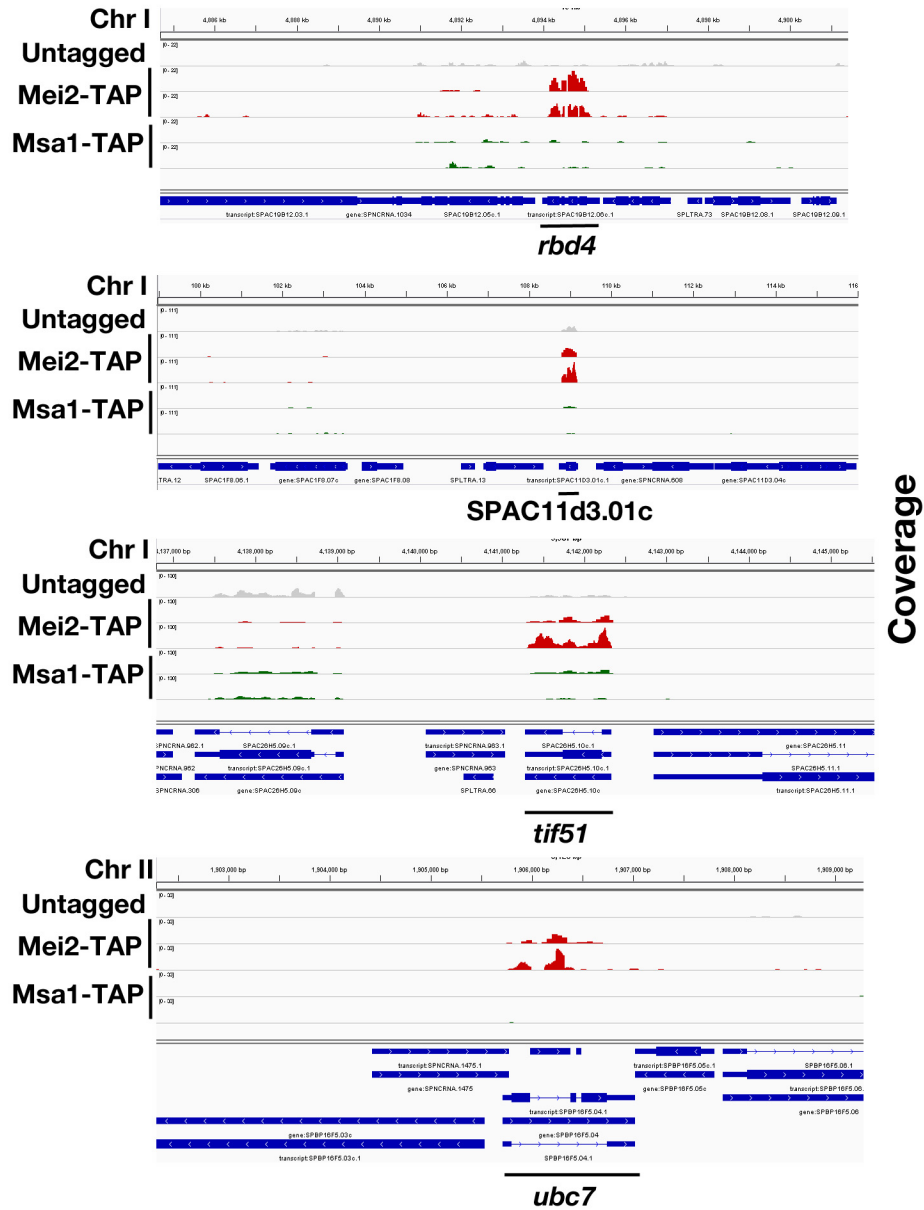

Supplement: rsob180110supp1.pdf [file rsob180110supp1.pdf]
