# Supplementary material for: mmi1 and rep2 mRNAs are novel RNA targets of the Mei2 RNA-binding protein during early meiosis in Schizosaccharomyces pombe
Source: Open Biol. 2018 Sep 26;8(9):180110. doi: 10.1098/rsob.180110 (PMC6170507; doi:10.1098/rsob.180110)
Supplement: Supplementary Table 2 - Mei2 CLIP targets [file rsob180110supp5.xlsx]

## Sheet: mei2_vs_untagged
Name	chr	start	end	size	fold	p-value	feat_start	feat_end	strand	type
SPNCRNA.103	II	336229	339998	3769	86.4	0	336351	338426	-	gene
SPNCRNA.53	I	4008719	4008919	200	4.01	0	4008054	4009905	-	ncRNA_gene
SPNCRNA.857	I	2872803	2874457	1654	7.81	2.7e-167	2872137	2874308	+	ncRNA_gene
SPAC26H5.10c	I	4141373	4142349	976	7.34	1.78e-134	4141281	4142329	-	gene
SPBC2G2.10c	II	3453744	3454309	565	108.03	1.87e-67	3453746	3454535	-	gene
SPCC736.12c	III	339718	340160	442	16.02	7.57e-66	337088	340150	-	gene
SPSNRNA.03	I	987648	987958	310	4.91	1.28e-64	987631	988266	-	snRNA_gene
SPSNORNA.20	I	3394826	3395098	272	4.65	1.25e-40	3394875	3395200	+	snoRNA_gene
SPAC11D3.01c	I	108839	109191	352	4.32	4.87e-40	108732	109195	-	gene
SPAC9E9.03	I	4439852	4440515	663	6.46	6.65e-34	4439837	4442513	+	gene
SPAC19B12.06c	I	4894184	4895025	841	15.06	1.36e-32	4893974	4895378	-	gene
SPCC1235.07	III	191833	192033	200	4.45	4.29e-32	190580	192114	+	gene
SPBC2F12.11c	II	1717739	1718395	656	5.88	4.76e-32	1717715	1719322	+	gene
SPCC1322.07c	III	1302028	1302413	385	5.78	5.16e-32	1299511	1302574	-	gene
SPBP16F5.04	II	1906155	1906355	200	55.97	2.51e-29	1905712	1907025	+	gene
SPCC736.12c	III	338292	339376	1084	5.73	2.56e-28	337088	340150	-	gene
SPBP23A10.11c	II	2019987	2020598	611	5.08	1.96e-22	2018920	2021589	-	gene
SPCC16A11.09c	III	886596	886796	200	14.06	6.5e-22	885686	886972	-	gene
SPAC9E9.03	I	4440821	4441674	853	5.03	1.07e-21	4439837	4442513	+	gene
SPAC3H8.04	I	593109	593683	574	10.25	8.11e-21	592226	593906	+	gene

## Sheet: mei2_vs_msa1
Name	chr	start	end	size	fold	p-value	feat_start	feat_end	strand	type
SPNCRNA.103	II	336229	339998	3769	29.18	0	336351	338426	-	gene
SPRRNA.49	III	2443758	2443958	200	6.62	2.11e-286	2443713	2447197	+	rRNA_gene
SPNCRNA.857	I	2872970	2874357	1387	5.78	7.62e-124	2872137	2874308	+	ncRNA_gene
SPNCRNA.98	I	4268705	4268955	250	4.26	6.23e-111	4268566	4269064	+	ncRNA_gene
SPRRNA.49	III	2446115	2446315	200	4.75	1.87e-107	2443713	2447197	+	rRNA_gene
SPAC26H5.10c	I	4141373	4142298	925	4.5	5.33e-87	4141281	4142329	-	gene
SPCC736.12c	III	339718	340160	442	9.58	2.09e-49	337088	340150	-	gene
SPCC306.08c	III	422655	422855	200	6.75	5.7e-48	421646	423488	-	gene
SPBC2F12.11c	II	1717739	1718445	706	8.6	1.11e-43	1717715	1719322	+	gene
SPBP23A10.11c	II	2019987	2020888	901	5.87	4.7e-41	2018920	2021589	-	gene
SPCC1322.07c	III	1302028	1302614	586	5.57	3.17e-38	1299511	1302574	-	gene
SPCC736.12c	III	338292	339376	1084	7.9	3.48e-36	337088	340150	-	gene
SPAC13F5.03c	I	2175594	2175794	200	5.77	8.52e-36	2174641	2177050	-	gene
SPBP23A10.11c	II	2021220	2021580	360	5.17	7.15e-33	2018920	2021589	-	gene
SPAC11D3.01c	I	108839	109091	252	4.65	1.04e-32	108732	109195	-	gene
SPBP16F5.04	II	1906155	1906355	200	79.77	1.65e-32	1905712	1907025	+	gene
SPBC3D6.02	II	1268781	1269085	304	4.37	2.76e-32	1268479	1271559	+	gene
SPBC2G2.10c	II	3453744	3454309	565	12.83	1.01e-30	3453746	3454535	-	gene
SPAC19B12.06c	I	4894184	4894970	786	10.2	4e-25	4893974	4895378	-	gene
SPRRNA.46	III	2442424	2442624	200	4.6	6.11e-22	2440994	2442835	+	rRNA_gene

## Sheet: common
Gene	name	p-value	fold enrichment
SPNCRNA.103	sme2	0	86.4
SPACUNK4.17		2.7e-167	7.81
SPAC26H5.10c	tif51	1.78e-134	7.34
SPBC2G2.10c	mug110	1.87e-67	108.03
SPCC736.12c	mmi1	7.57e-66	16.02
SPAC11D3.01c		4.87e-40	4.32
SPAC19B12.06c		1.36e-32	15.06
SPBC2F12.11c	rep2	4.76e-32	5.88
SPCC1322.07c	mug150	5.16e-32	5.78	false positive
SPBP16F5.04	ubc7	2.51e-29	55.97
SPBP23A10.11c		1.96e-22	5.08
